# Supplementary material for: Graphene oxide and adenosine triphosphate as a source for functionalized carbon dots with applications in pH-triggered drug delivery and cell imaging
Source: Royal Society of Chemistry journal article supplement (doi:10.1039/c6ra27887f), 2017-01-01
Supplement: c6ra27887f1.pdf [file c6ra27887f1.pdf]

# **Graphene oxide and adenosine triphosphate as the source for producing carbon dots and their application for pH-triggered drug delivery and cell imaging**

Ming Zhang <sup>a, b</sup>, Ninglin Zhou <sup>a, b, c\*</sup>, Ping Yuan <sup>a, b</sup>, Yutian Su <sup>a, b</sup>, Maoni Shao <sup>a, b</sup>, Cheng Chi <sup>a, b</sup>

*<sup>a</sup> Jiangsu Collaborative Innovation Center for biological functional materials,*

*College of Chemistry and Materials Science, Nanjing Normal University, Nanjing*

*210023, China;*

*<sup>b</sup> Jiangsu Key Laboratory of Biofunctional Materials, Jiangsu Engineering Research*

*Center for Biomedical Function Materials, Nanjing 210023, China;*

*<sup>c</sup> Nanjing Zhou Ninglin Advanced Materials Technology Company Limited, Nanjing*

*211505, China*

Correspondence should be addressed to Ninglin Zhou, [zhouninglin@njnu.edu.com](mailto:zhouninglin@njnu.edu.com)

**Fig. S1 (A) Particle size distribution image (DSL) of N,P-CDs. (B) Particle size distribution image (DSL) of DOX/N,P-CDs. (C) Zeta potential of N,P-CDs. (D) Zeta potential of DOX. (E) Zeta potential of DOX/N,P-CDs. (F) Zeta potential of N,P-CDs prepared from ATP.**

**Fig. S2 (A) Fluorescence excitation and emission spectra of N,P-CDs. (B) Fluorescence intensity of N,P-CDs prepared from GO-ATP and ATP. (C) Normalized results of excitation-dependent emission shift of N,P-CDs.**

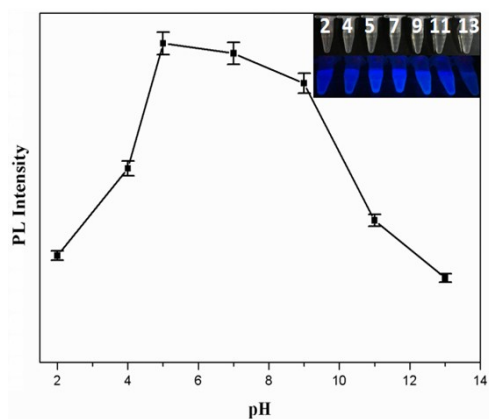

**Fig. S3** Fluorescence intensity of N,P-CDs at different pHs (5 mM sodium phosphate, pH 2-13).

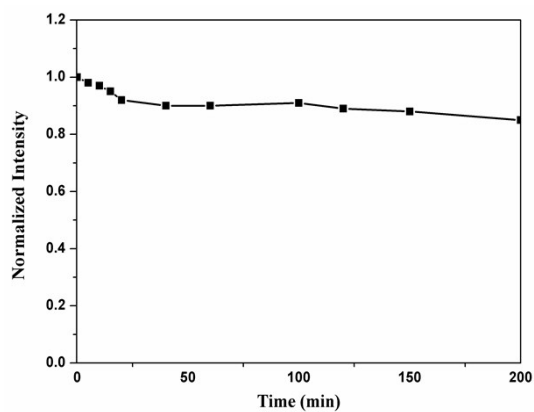

**Fig. S4** Photoluminescence intensity of N,P-CDs after being exposed to the UV light for different time.

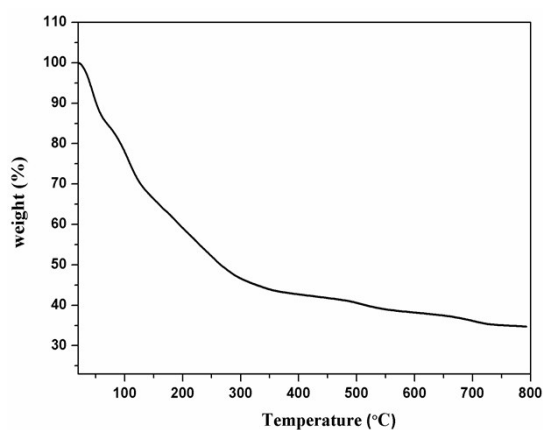

**Fig. S5** Thermal gravity analysis of N,P-CDs.

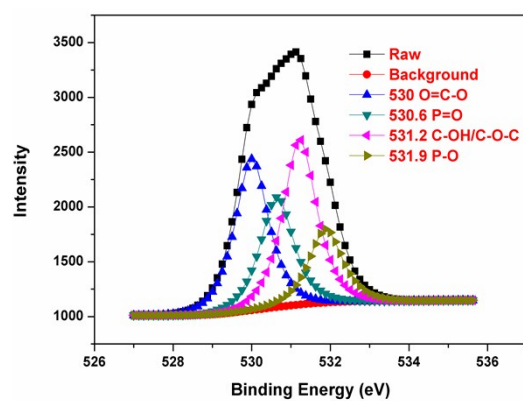

**Fig. S6 O1s XPS spectra of N,P-CDs.**

**Fig. S7 The particle size of DOX/N,P-CDs at different temperatures and pH.**

**Fig. S8 (i) Morphology of HeLa cells after culture 24 h suspension at 10 µg/ml. (ii) HeLa cells stained with Hoechst 33342 after incubating in various media for 24 h.**

\_\_\_\_\_

**Fig. S9 LSCM images of A549 cells incubated with N,P-CDs for 3 h observed under (A) bright field, (B) 488 nm, (C) their merged images, respectively. Scale bar = 20 µm. (E) N,P-CDs entered *S. aureus* and fluorescence images upon excitation with blue light (460–480 nm), (F) No fluorescent signal is detected in *S. aureus* in the absence of N,P-CDs. Scale bar = 50 µm.**

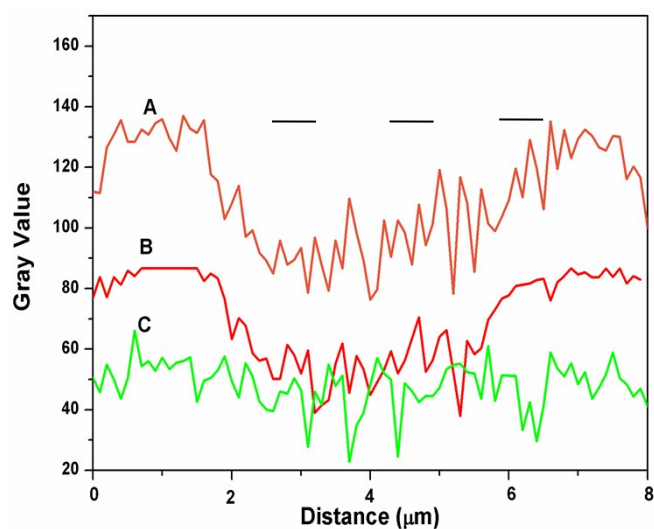

**Fig. S10 Structure of the domain fluorescence intensity of A549 cells incubated with DOX/N,P-CDs for 3 h observed under 488 (C), 543 nm(B) and their merged images (A), respectively. The inset shows the LSCM images of A549 cells incubated with DOX/N,P-CDs for 3 h observed under 488, 543 nm and their merged images, respectively. Scale bar = 8 μm.**
